# Supplementary material for: Biochemical Properties of a New Cold-Active Mono- and Diacylglycerol Lipase from Marine Member Janibacter sp. Strain HTCC2649
Source: PubMed Central journal article supplement (PMC4100168; doi:10.3390/ijms150610554), 2014-06-12
Supplement: ijms-15-10554-s001.pdf [file ijms-15-10554-s001.pdf]

# Supplementary Information

**Figure S1.** Phylogenetic tree of 9 predicted lipases from marine *Janibacter* sp. strain HTCC2649 and putative lipases from different families. The tree was constructed using the MEGA 6.0 program with the neighbor-joining algorithm using bootstrap method and pairwise deletion. Bar: 0.2 substitutions per amino acid site. The red line shows the predicted lipases from marine *Janibacter* sp. strain HTCC2649.

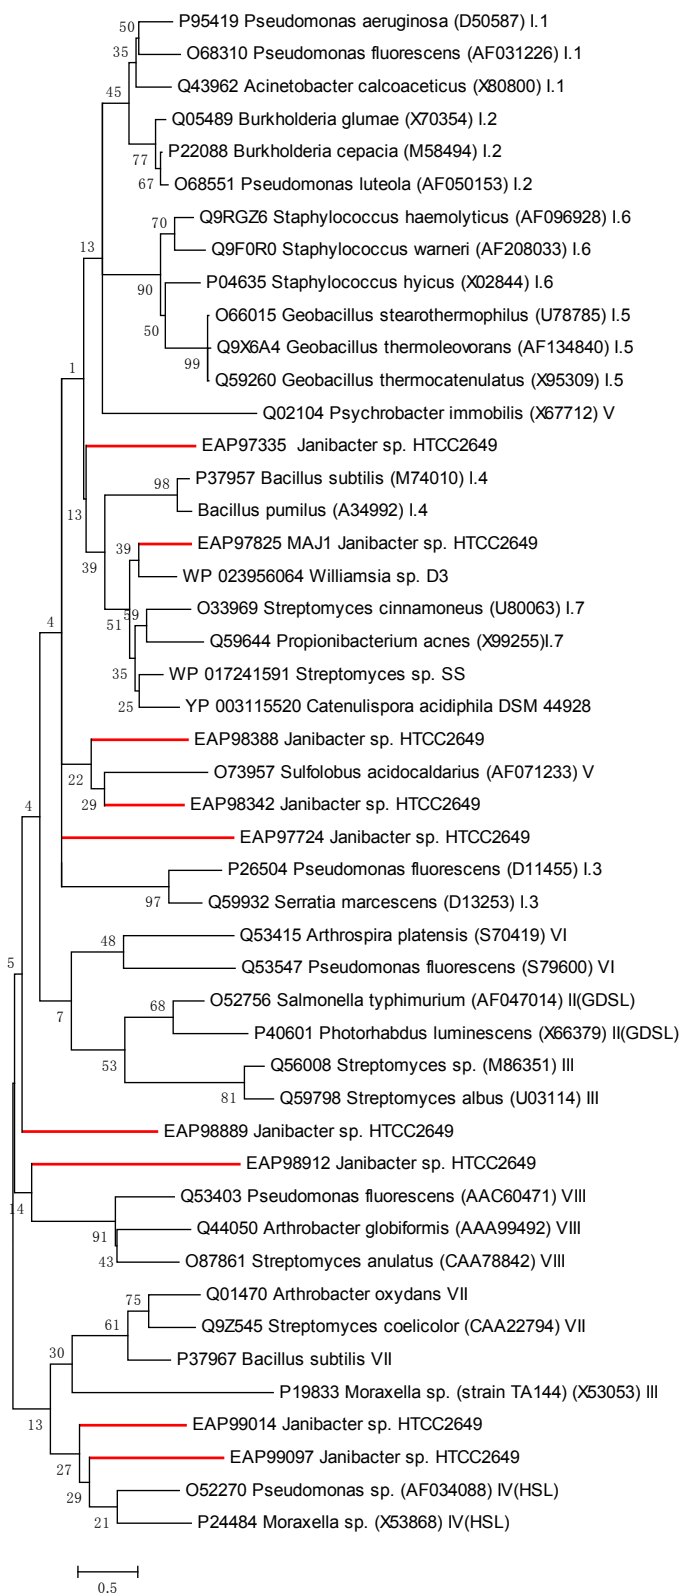

**Table S1.** Chemical composition (%) of fractions during hydrolysis of TAG-enriched camellia oil.

| Hours | TAG          | 1,3-DAG     | 1,2-DAG     | FFAs        |
|-------|--------------|-------------|-------------|-------------|
| 0 h   | 96.90 ± 0.18 | 0.95 ± 0.03 | 1.67 ± 0.15 | 0.63 ± 0.15 |
| 0.5 h | 96.49 ± 0.25 | 0.97 ± 0.09 | 1.65 ± 0.24 | 0.89 ± 0.14 |
| 1 h   | 96.52 ± 0.46 | 1.09 ± 0.09 | 1.62 ± 0.32 | 0.77 ± 0.16 |
| 2 h   | 96.41 ± 0.34 | 1.03 ± 0.04 | 1.62 ± 0.28 | 0.94 ± 0.15 |
| 3 h   | 96.10 ± 0.03 | 1.00 ± 0.11 | 1.90 ± 0.06 | 1.00 ± 0.08 |
| 4 h   | 95.81 ± 0.14 | 1.06 ± 0.07 | 1.91 ± 0.06 | 1.21 ± 0.08 |
| 5 h   | 95.80 ± 0.14 | 0.97 ± 0.07 | 1.91 ± 0.11 | 1.31 ± 0.07 |
| 6 h   | 96.26 ± 0.19 | 1.00 ± 0.23 | 1.70 ± 0.32 | 1.04 ± 0.09 |
| 8 h   | 95.77 ± 0.29 | 0.99 ± 0.15 | 1.77 ± 0.11 | 1.47 ± 0.22 |
| 12 h  | 96.09 ± 0.11 | 1.01 ± 0.15 | 1.76 ± 0.19 | 1.14 ± 0.05 |

**Table S2.** Chemical composition (%) of fractions during hydrolysis of DAG-enriched camellia oil.

| Hours | 1,3-DAG      | 1,2-DAG      | 1/3-MAG      | 2-MAG       | FFAs         |
|-------|--------------|--------------|--------------|-------------|--------------|
| 0 h   | 67.89 ± 2.14 | 31.95 ± 2.01 | 0.00 ± 0.00  | 0.00 ± 0.00 | 0.00 ± 0.00  |
| 0.5 h | 28.44 ± 0.74 | 26.36 ± 0.97 | 11.30 ± 0.23 | 1.98 ± 0.25 | 31.91 ± 1.36 |
| 1 h   | 24.24 ± 2.26 | 24.86 ± 1.02 | 12.10 ± 0.14 | 2.69 ± 0.95 | 36.10 ± 2.58 |
| 2 h   | 16.75 ± 0.53 | 24.41 ± 1.22 | 10.55 ± 0.46 | 1.67 ± 0.65 | 46.62 ± 0.96 |
| 3 h   | 12.79 ± 0.25 | 20.59 ± 1.14 | 8.63 ± 0.21  | 2.28 ± 0.24 | 55.71 ± 0.57 |
| 4 h   | 10.32 ± 0.82 | 22.28 ± 1.09 | 6.74 ± 0.27  | 2.28 ± 1.51 | 58.38 ± 1.08 |
| 5 h   | 8.25 ± 0.86  | 21.25 ± 0.98 | 5.66 ± 0.49  | 1.89 ± 0.49 | 62.95 ± 1.57 |
| 6 h   | 7.72 ± 0.66  | 20.44 ± 0.76 | 4.62 ± 0.69  | 1.34 ± 0.58 | 65.89 ± 0.63 |
| 8 h   | 6.37 ± 0.63  | 19.64 ± 0.89 | 3.13 ± 0.44  | 1.98 ± 0.92 | 68.88 ± 1.39 |
| 12 h  | 5.53 ± 0.91  | 19.44 ± 0.87 | 2.96 ± 0.17  | 1.97 ± 0.40 | 70.10 ± 1.94 |

**Table S3.** Chemical composition (%) of fractions during hydrolysis of DAG: MAG (1:1)-enriched oil.

| Hours | 1,3-DAG      | 1,2-DAG      | 1/3-MAG      | 2-MAG       | FFA          |
|-------|--------------|--------------|--------------|-------------|--------------|
| 0 h   | 38.25 ± 1.39 | 17.42 ± 1.96 | 42.33 ± 2.02 | 2.44 ± 0.29 | 0.00 ± 0.00  |
| 0.5 h | 21.09 ± 2.15 | 16.26 ± 1.33 | 35.94 ± 2.20 | 2.81 ± 0.49 | 23.92 ± 1.65 |
| 1 h   | 16.14 ± 1.43 | 13.31 ± 1.15 | 33.41 ± 2.12 | 2.77 ± 0.17 | 34.36 ± 0.57 |
| 2 h   | 15.47 ± 1.22 | 13.47 ± 0.48 | 29.28 ± 1.12 | 2.46 ± 0.36 | 39.31 ± 1.56 |
| 3 h   | 14.41 ± 0.91 | 12.60 ± 0.56 | 25.28 ± 1.18 | 2.59 ± 0.34 | 45.11 ± 1.65 |
| 4 h   | 13.75 ± 0.97 | 13.07 ± 0.58 | 19.76 ± 1.30 | 2.69 ± 0.19 | 50.73 ± 1.75 |
| 5 h   | 13.27 ± 0.45 | 13.34 ± 0.77 | 16.69 ± 0.90 | 2.58 ± 0.03 | 54.12 ± 1.18 |
| 6 h   | 12.89 ± 0.63 | 13.05 ± 0.54 | 13.99 ± 1.19 | 2.44 ± 0.07 | 57.63 ± 1.40 |
| 8 h   | 11.96 ± 0.28 | 12.51 ± 0.50 | 10.66 ± 0.97 | 2.04 ± 0.09 | 62.83 ± 1.60 |
| 12 h  | 11.55 ± 0.81 | 12.73 ± 0.64 | 7.48 ± 1.53  | 1.40 ± 0.29 | 66.84 ± 2.58 |
